# Supplementary material for: Replacement of acetate with citrate in dialysis fluid: a randomized clinical trial of short term safety and fluid biocompatibility
Source: PubMed Central journal article supplement (PMC4124727; doi:10.1186/1471-2369-14-216), 2013-10-09
Supplement: 1471-2369-14-216-S1.pdf [file 1471-2369-14-216-S1.pdf]

TABLE S1: Adverse events

| <b>Summary of adverse events</b>          | <b>Control Fluid</b> | <b>Citrate Fluid</b> | <b>Wash out</b> |
|-------------------------------------------|----------------------|----------------------|-----------------|
| Total Adverse events                      | 18                   | 16                   | 5               |
| <i>General disorders</i>                  | 3                    | 2                    | 4               |
| <i>Infections and infestations</i>        | 3                    | 8                    | 1               |
| <i>Investigations</i>                     | 2                    | 0                    | 0               |
| <i>Metabolism and nutrition disorders</i> | 3                    | 0                    | 0               |
| <i>Others</i>                             | 7                    | 6                    | 0               |
| Total serious adverse events (n)          | 5                    | 3                    | 2               |
| Total product related adverse events (n)  | 0                    | 3*                   | 1**             |

\* Classified as not assessable in relationship to study product by investigator but worst-case assessed by sponsor

\*\* Patient accidentally received study product during wash-out

TABLE S2: Biocompatibility parameters (pre-dialysis)

| Parameter, Mean $\pm$ SEM                            | Control Fluid   |                 | Citrate Fluid   |                 |
|------------------------------------------------------|-----------------|-----------------|-----------------|-----------------|
|                                                      | Week 0          | Week 6          | Week 0          | Week 6          |
| <b>Inflammation</b>                                  |                 |                 |                 |                 |
| <i>CRP (mg/l)</i>                                    | 17.5 $\pm$ 8.9  | 8.4 $\pm$ 2.1   | 8.3 $\pm$ 3.6   | 13.8 $\pm$ 0.34 |
| <i>Pentraxin 3 (ng/ml)</i>                           | 1.76 $\pm$ 0.29 | 1.90 $\pm$ 0.30 | 1.82 $\pm$ 0.39 | 2.01 $\pm$ 0.34 |
| <i>IL-6 (ng/l)</i>                                   | 17.3 $\pm$ 8.2  | 11.4 $\pm$ 1.7  | 11.9 $\pm$ 2.3  | 13.6 $\pm$ 3.0  |
| <i>TNF-<math>\alpha</math> (ng/l)</i>                | 26.3 $\pm$ 1.3  | 24.9 $\pm$ 1.5  | 26.3 $\pm$ 1.4  | 25.5 $\pm$ 1.4  |
| <b>Oxidative stress</b>                              |                 |                 |                 |                 |
| <i>MDA (<math>\mu</math>M)</i>                       | 1.64 $\pm$ 0.15 | 1.55 $\pm$ 0.15 | 1.59 $\pm$ 0.14 | 1.57 $\pm$ 0.14 |
| <i>8-oxo-dG (ng/ml)</i>                              | 0.59 $\pm$ 0.04 | 0.62 $\pm$ 0.04 | 0.61 $\pm$ 0.04 | 0.65 $\pm$ 0.04 |
| <i>mAOPP (<math>\mu</math>M)</i>                     | 118.0 $\pm$ 6.2 | 109.1 $\pm$ 4.6 | 108.6 $\pm$ 5.1 | 106.9 $\pm$ 4.0 |
| <i>Glutathione GSH/GSSG ratio</i>                    | 0.28 $\pm$ 0.04 | 0.28 $\pm$ 0.04 | 0.32 $\pm$ 0.04 | 0.25 $\pm$ 0.03 |
| <i><math>\gamma</math>GluCys (<math>\mu</math>M)</i> | 3.10 $\pm$ 0.16 | 3.08 $\pm$ 0.16 | 3.21 $\pm$ 0.18 | 3.01 $\pm$ 0.16 |
| <i>CysGly (<math>\mu</math>M)</i>                    | 57.3 $\pm$ 3.4  | 58.2 $\pm$ 3.4  | 57.2 $\pm$ 3.4  | 55.6 $\pm$ 3.0  |
| <i>Cys (<math>\mu</math>M)</i>                       | 428 $\pm$ 22    | 446 $\pm$ 21    | 446 $\pm$ 23    | 424 $\pm$ 20    |
| <i>HomoCys (<math>\mu</math>M)</i>                   | 22.5 $\pm$ 2.1  | 21.2 $\pm$ 1.3  | 22.5 $\pm$ 1.7  | 21.1 $\pm$ 1.4  |
| <b>Advanced Glycation End-products</b>               |                 |                 |                 |                 |
| <i>Total AGE (AU)</i>                                | 6456 $\pm$ 365  | 6280 $\pm$ 326  | 6935 $\pm$ 826  | 6466 $\pm$ 293  |
| <i>CML (ng/ml)</i>                                   | 122 $\pm$ 9.8   | 116 $\pm$ 10.2  | 119 $\pm$ 9.6   | 118 $\pm$ 10.1  |
| <i>Pentosidine (nM)</i>                              | 1489 $\pm$ 154  | 1507 $\pm$ 149  | 1468 $\pm$ 144  | 1490 $\pm$ 138  |
